# Supplementary material for: Single step solution deposition of multilayer solar absorber films at ambient temperature
Source: Royal Society of Chemistry journal article supplement (doi:10.1039/b608182g), 2006-01-01
Supplement: b608182g.pdf [file b608182g.pdf]

Electronic Supplementary Information

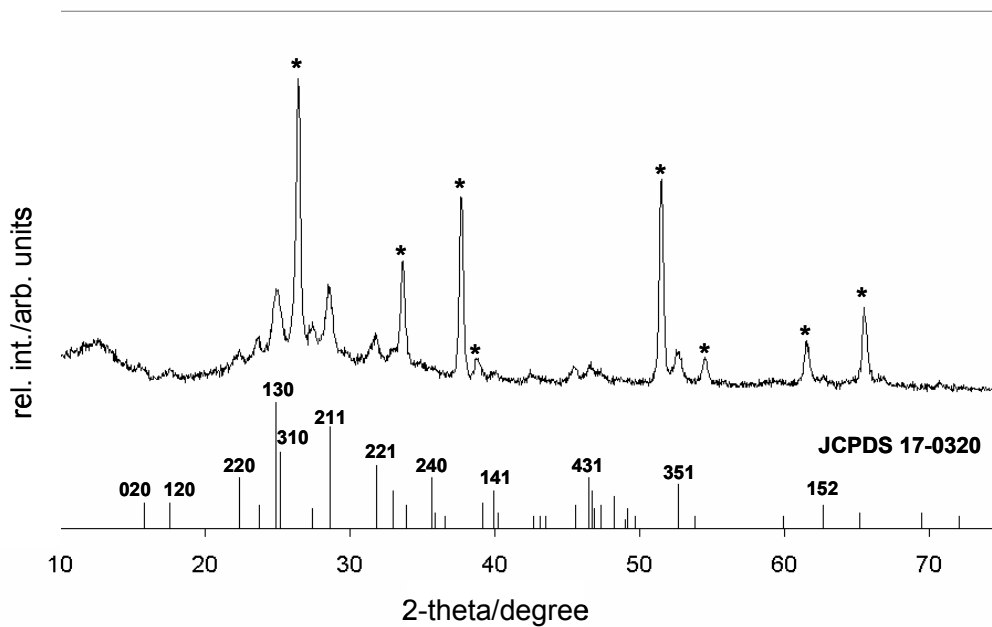

**Fig A.** Powder XRD of as-deposited thin films deposited from thioglycolate/thiosulfate-based baths, with main peaks indexed as shown to orthorhombic  $\text{Bi}_2\text{S}_3$  (JCPDS 17-0320). No evidence for secondary crystalline phases (*e.g.*  $\text{Bi}_2\text{O}_3$  or  $\text{Bi}(\text{OH})_3$ ) was obtained.\*Signals assigned to FTO-glass substrate.
